# Supplementary material for: Identification of SNPs and Candidate Genes Associated with Salt Stress in Two Korean Sorghum Cultivars and Understanding Selection Pressures in the Breeding Process
Source: MDPI journal article supplement (doi:10.3390/agronomy12102511), 2022-10-14
Supplement: s1 [file s1]

**Supplementary Table S1.** DEGs with non-synonymous SNPs in leaves

| Gene Symbol | Description                                                          |
|-------------|----------------------------------------------------------------------|
| LOC8086204  | zinc finger protein ZPR1                                             |
| LOC8073388  | zinc finger BED domain-containing protein RICESLEEPER 2              |
| LOC8084290  | UPF0481 protein At3g47200                                            |
| LOC8063682  | UDP-glycosyltransferase 91C1                                         |
| LOC8081774  | UDP-glycosyltransferase 76C2                                         |
| LOC8085391  | transmembrane protein 56-B                                           |
| LOC8058078  | transcription factor GHD7                                            |
| LOC8064842  | tonoplast dicarboxylate transporter                                  |
| LOC8085912  | TIP41-like protein                                                   |
| LOC8071656  | SPX domain-containing protein 1                                      |
| LOC8082672  | S-norcochlorine synthase                                             |
| LOC8058550  | signal recognition particle 54 kDa protein, chloroplastic            |
| LOC8072649  | RING-H2 finger protein ATL80                                         |
| LOC8076019  | RING-H2 finger protein ATL8                                          |
| LOC8071965  | putative H/ACA ribonucleoprotein complex subunit 1-like protein 1    |
| LOC8055494  | protein NUCLEAR FUSION DEFECTIVE 4                                   |
| LOC8071228  | protein NETWORKED 4A                                                 |
| LOC8057624  | protein HASTY 1                                                      |
| LOC8084587  | prohibitin-2, mitochondrial                                          |
| LOC8082038  | probable LRR receptor-like serine/threonine-protein kinase At4g36180 |
| LOC8070645  | probable F-box protein At2g36090                                     |
| LOC8086436  | probable carboxylesterase 15                                         |
| LOC8061535  | probable acyl-activating enzyme 5, peroxisomal                       |
| LOC8066766  | proactivator polypeptide-like 1                                      |
| LOC8077640  | premnaspirodiene oxygenase                                           |
| LOC8071139  | polyphenol oxidase II, chloroplastic                                 |
| LOC8082269  | phosphatidylcholine:diacylglycerol cholinephosphotransferase 1       |
| LOC8065088  | pentatricopeptide repeat-containing protein At3g53700, chloroplastic |
| LOC8074555  | non-specific lipid-transfer protein 2                                |
| LOC8054095  | nicotianamine aminotransferase A                                     |
| LOC8085664  | NHP2-like protein 1                                                  |
| LOC8072272  | momilactone A synthase                                               |
| LOC8082249  | L-type lectin-domain containing receptor kinase IX.1                 |
| LOC8065807  | lanC-like protein GCL2                                               |
| LOC8068782  | jasmonate O-methyltransferase                                        |
| LOC8072250  | histone H2B.1                                                        |
| LOC8055587  | hepatoma-derived growth factor-related protein 2                     |
| LOC8061746  | glycerol-3-phosphate 2-O-acyltransferase 6                           |
| LOC8058246  | GDSL esterase/lipase At1g31550                                       |

|              |                                                      |
|--------------|------------------------------------------------------|
| LOC8073648   | fructose-bisphosphate aldolase, chloroplastic        |
| LOC8057276   | F-box/FBD/LRR-repeat protein At4g00160               |
| LOC8068715   | F-box protein At1g67340                              |
| LOC8059007   | eukaryotic translation initiation factor 3 subunit G |
| LOC8055639   | ethylene-responsive transcription factor ERF104      |
| LOC8073540   | ethylene-responsive transcription factor ERF060      |
| LOC8086050   | ethylene-responsive transcription factor 4           |
| LOC8085844   | ethylene-responsive transcription factor 11          |
| LOC8062991   | ent-cassadiene C2-hydroxylase                        |
| LOC8079195   | E3 ubiquitin-protein ligase EL5                      |
| LOC8055307   | DNA oxidative demethylase ALKBH2                     |
| LOC8085890   | DNA mismatch repair protein MSH3                     |
| LOC8074840   | disease resistance protein RGA2                      |
| LOC8054599   | cytochrome P450 71A1                                 |
| LOC110431018 | cysteine-rich receptor-like protein kinase 25        |
| LOC8065187   | chaperone protein dnaJ 13                            |
| LOC8077480   | anthocyanidin 3-O-glucosyltransferase 2              |
| LOC8069107   | alpha-amylase/trypsin inhibitor                      |
| LOC8083795   | 40S ribosomal protein S12                            |
| LOC8084222   | 12-oxophytodienoate reductase 1                      |
| LOC8054161   | uncharacterized tRNA/rRNA methyltransferase YsgA     |
| LOC8062760   | uncharacterized protein C227.17c                     |
| LOC8084286   | uncharacterized LOC8084286                           |
| LOC8082719   | uncharacterized LOC8082719                           |
| LOC8082387   | uncharacterized LOC8082387                           |
| LOC8082080   | uncharacterized LOC8082080                           |
| LOC8080202   | uncharacterized LOC8080202                           |
| LOC8078752   | uncharacterized LOC8078752                           |
| LOC8077983   | uncharacterized LOC8077983                           |
| LOC8076350   | uncharacterized LOC8076350                           |
| LOC8068344   | uncharacterized LOC8068344                           |
| LOC8068280   | uncharacterized LOC8068280                           |
| LOC8067380   | uncharacterized LOC8067380                           |
| LOC8066496   | uncharacterized LOC8066496                           |
| LOC8066486   | uncharacterized LOC8066486                           |
| LOC8066157   | uncharacterized LOC8066157                           |
| LOC8064453   | uncharacterized LOC8064453                           |
| LOC8060343   | uncharacterized LOC8060343                           |
| LOC8059214   | uncharacterized LOC8059214                           |
| LOC8056461   | uncharacterized LOC8056461                           |
| LOC8054980   | uncharacterized LOC8054980                           |

|              |                              |
|--------------|------------------------------|
| LOC8054110   | uncharacterized LOC8054110   |
| LOC110434949 | uncharacterized LOC110434949 |
| LOC110432337 | uncharacterized LOC110432337 |
| LOC110432325 | uncharacterized LOC110432325 |
| LOC110429606 | uncharacterized LOC110429606 |
| LOC110429564 | uncharacterized LOC110429564 |

**Supplementary Table S2.** DEGs with non-synonymous SNPs in roots

| Gene Symbol | Description                                                                  |
|-------------|------------------------------------------------------------------------------|
| LOC8086258  | uridine 5'-monophosphate synthase                                            |
| LOC8076019  | UDP-glycosyltransferase 88B1                                                 |
| LOC8075879  | TIP41-like protein                                                           |
| LOC8074840  | SPX domain-containing protein 1                                              |
| LOC8073754  | signal recognition particle 54 kDa protein, chloroplastic                    |
| LOC8073470  | rust resistance kinase Lr10-like                                             |
| LOC8072272  | rust resistance kinase Lr10-like                                             |
| LOC8072250  | root phototropism protein 2                                                  |
| LOC8071656  | RING-H2 finger protein ATL8                                                  |
| LOC8070125  | ribosome maturation protein SBDS                                             |
| LOC8069919  | riboflavin biosynthesis protein PYRD, chloroplastic                          |
| LOC8069746  | renalase                                                                     |
| LOC8069719  | regulatory protein viviparous-1-like                                         |
| LOC8069064  | receptor-like protein kinase 5                                               |
| LOC8068782  | receptor-like kinase LIP2                                                    |
| LOC8068519  | putative septum site-determining protein minD homolog, chloroplastic         |
| LOC8068518  | putative multidrug resistance protein                                        |
| LOC8067864  | putative disease resistance RPP13-like protein 3                             |
| LOC8067647  | protein NRT1/ PTR FAMILY 8.3                                                 |
| LOC8067380  | protein NRT1/ PTR FAMILY 8.1-like                                            |
| LOC8067323  | protein HASTY 1                                                              |
| LOC8067165  | probably inactive leucine-rich repeat receptor-like protein kinase At2g25790 |
| LOC8066872  | probable protein arginine N-methyltransferase 6.1                            |
| LOC8066766  | probable LRR receptor-like serine/threonine-protein kinase At4g36180         |
| LOC8066640  | probable low-specificity L-threonine aldolase 2                              |
| LOC8066486  | probable folate-bioperin transporter 7                                       |
| LOC8066157  | probable cinnamyl alcohol dehydrogenase 1                                    |
| LOC8065801  | probable 5'-adenylylsulfate reductase 1, chloroplastic                       |
| LOC8065309  | proactivator polypeptide-like 1                                              |
| LOC8065187  | pentatricopeptide repeat-containing protein At5g41170, mitochondrial         |
| LOC8065176  | pentatricopeptide repeat-containing protein At3g29230                        |
| LOC8065052  | pentatricopeptide repeat-containing protein At2g33760                        |

|              |                                                                    |
|--------------|--------------------------------------------------------------------|
| LOC8064504   | palmitoyl-acyl carrier protein thioesterase, chloroplastic         |
| LOC8062760   | ninja-family protein 5                                             |
| LOC8060656   | nicotianamine aminotransferase A                                   |
| LOC8060560   | momilactone A synthase                                             |
| LOC8060343   | magnesium protoporphyrin IX methyltransferase, chloroplastic       |
| LOC8060105   | LOB domain-containing protein 38                                   |
| LOC8059010   | jasmonate O-methyltransferase                                      |
| LOC8059007   | homocysteine S-methyltransferase 3                                 |
| LOC8058550   | homeobox-leucine zipper protein ROC5                               |
| LOC8057909   | histone H2B.1                                                      |
| LOC8057624   | G-type lectin S-receptor-like serine/threonine-protein kinase B120 |
| LOC8057276   | F-box/FBD/LRR-repeat protein At4g00160                             |
| LOC8056982   | exosome complex component RRP4 homolog                             |
| LOC8056352   | eukaryotic translation initiation factor 5B                        |
| LOC8056290   | eukaryotic translation initiation factor 3 subunit G-B             |
| LOC8056109   | eukaryotic translation initiation factor 3 subunit G               |
| LOC8055639   | ethylene-responsive transcription factor ERF104                    |
| LOC8054848   | epoxide hydrolase B                                                |
| LOC8054095   | E3 ubiquitin-protein ligase EL5                                    |
| LOC110436673 | disease resistance protein RGA2                                    |
| LOC110436479 | cytochrome P450 89A2                                               |
| LOC110435489 | cytochrome P450 704C1                                              |
| LOC110434949 | cytochrome c6, chloroplastic                                       |
| LOC110434711 | cyanidin 3-O-rutinoside 5-O-glucosyltransferase                    |
| LOC110433986 | chaperone protein dnaJ 13                                          |
| LOC110433985 | CDK5RAP3-like protein                                              |
| LOC110433833 | CASP-like protein 1D1                                              |
| LOC110432506 | aquaporin TIP4-2                                                   |
| LOC110432337 | alpha-glucan phosphorylase, H isozyme                              |
| LOC110432325 | acyl-coenzyme A thioesterase 9, mitochondrial                      |
| LOC110431335 | acyl carrier protein 4, chloroplastic                              |
| LOC110430236 | AAA-ATPase At3g50940                                               |
| LOC110429564 | 18.6 kDa class III heat shock protein                              |
| LOC8085912   | uncharacterized protein C227.17c                                   |
| LOC8085867   | uncharacterized LOC8076331                                         |
| LOC8085077   | uncharacterized LOC8075879                                         |
| LOC8084413   | uncharacterized LOC8073754                                         |
| LOC8083121   | uncharacterized LOC8073470                                         |
| LOC8082941   | uncharacterized LOC8067380                                         |
| LOC8082540   | uncharacterized LOC8067323                                         |
| LOC8082038   | uncharacterized LOC8066486                                         |

|            |                              |
|------------|------------------------------|
| LOC8081950 | uncharacterized LOC8066157   |
| LOC8080734 | uncharacterized LOC8060343   |
| LOC8080717 | uncharacterized LOC8056982   |
| LOC8079731 | uncharacterized LOC8056290   |
| LOC8079443 | uncharacterized LOC110436479 |
| LOC8079195 | uncharacterized LOC110435489 |
| LOC8079064 | uncharacterized LOC110434949 |
| LOC8078620 | uncharacterized LOC110434711 |
| LOC8078254 | uncharacterized LOC110432337 |
| LOC8077992 | uncharacterized LOC110432325 |
| LOC8077359 | uncharacterized LOC110431335 |
| LOC8077298 | uncharacterized LOC110430236 |
| LOC8076331 | uncharacterized LOC110429564 |

---
