# Supplementary material for: Identification of SNPs and Candidate Genes Associated with Salt Stress in Two Korean Sorghum Cultivars and Understanding Selection Pressures in the Breeding Process
Source: MDPI journal article supplement (doi:10.3390/agronomy12102511), 2022-10-14
Supplement: s1 [file s1]

**Supplementary Table S3.** List of Nampungchal genes along with  $K_a / K_s$  ratio based on the sorghum reference genome (BTx623)

| Gene symbol  | $K_a/K_s$ ratio | Description                                                         |
|--------------|-----------------|---------------------------------------------------------------------|
| LOC8071262   | 14              | putative serine/threo9-protein kinase-like protein CCR3             |
| LOC8068715   | 14              | F-box protein At1g67340                                             |
| LOC8055185   | 14              | sulfofructose kinase                                                |
| LOC8085294   | 12              | nuclear pore complex protein NUP214                                 |
| LOC8080155   | 12              | translation initiation factor IF-2                                  |
| LOC8074809   | 12              | E3 ubiquitin-protein ligase RMA1H1                                  |
| LOC8074063   | 12              | putative disease resistance RPP13-like protein 3                    |
| LOC8067748   | 12              | G-type lectin S-receptor-like serine/threo9-protein kinase LECRK4   |
| LOC8082080   | 10              | PF13637 - Ankyrin repeats                                           |
| LOC8074071   | 10              | UDP-glycosyltransferase 73D1                                        |
| LOC8069729   | 10              | wall-associated receptor kinase 2                                   |
| LOC8068195   | 10              | CBL-interacting protein kinase 17                                   |
| LOC8062110   | 10              | probable E3 ubiquitin-protein ligase RNF144A-B                      |
| LOC8058550   | 10              | signal recognition particle 54 kDa protein, chloroplastic           |
| LOC8085277   | 8               | cytochrome P450 94A1                                                |
| LOC8082315   | 8               | phylloplanin                                                        |
| LOC8079104   | 8               | receptor kinase-like protein Xa21                                   |
| LOC8079056   | 8               | PTHR20961//PTHR20961:SF28 - GLYCOSYLTRANSFERASE                     |
| LOC8078852   | 8               | ATP-dependent Clp protease ATP-binding subunit CLPT1, chloroplastic |
| LOC8078001   | 8               | WD repeat-containing protein 44                                     |
| LOC8074808   | 8               | putative nuclear RNA export factor SDE5                             |
| LOC8071692   | 8               | multiple organellar RNA editing factor 1, mitochondrial             |
| LOC8069648   | 8               | MOB kinase activator-like 1A                                        |
| LOC8067747   | 8               | crocetin glucosyltransferase 2                                      |
| LOC8062663   | 8               | probable E3 ubiquitin-protein ligase RHY1A                          |
| LOC8061909   | 8               | phospholipase D zeta 1                                              |
| LOC8061535   | 8               | probable acyl-activating enzyme 5, peroxisomal                      |
| LOC8059421   | 8               | esterase PIR7B                                                      |
| LOC8055864   | 8               | tonoplast dicarboxylate transporter                                 |
| LOC110437403 | 8               | collagen alpha-1(I) chain-like                                      |
| LOC110433044 | 8               | reactive Intermediate Deaminase A, chloroplastic                    |
| LOC110429543 | 8               | ureide permease 1-like                                              |
| LOC8070475   | 7               | double-stranded RNA-binding protein 6                               |
| LOC8068388   | 7               | argi9 decarboxylase 1                                               |
| LOC8058534   | 7               | 2-carboxy-D-arabinitol-1-phosphatase                                |
| LOC8085484   | 6               | pheophorbide a oxygenase, chloroplastic                             |
| LOC8085287   | 6               | PF02365 - No apical meristem (NAM) protein (NAM)                    |
| LOC8083044   | 6               | putative disease resistance protein RGA3                            |
| LOC8082672   | 6               | S-noroclaurine synthase                                             |
| LOC8082158   | 6               | probable RNA helicase SDE3                                          |
| LOC8081385   | 6               | protein ETHYLENE-INSENSITIVE 2                                      |

|              |   |                                                                      |
|--------------|---|----------------------------------------------------------------------|
| LOC8080554   | 6 | Krueppel-like factor 12                                              |
| LOC8079685   | 6 | squamosa promoter-binding-like protein 6                             |
| LOC8079588   | 6 | UDP-glycosyltransferase 89B1                                         |
| LOC8078906   | 6 | peptidyl-prolyl cis-trans isomerase CYP40                            |
| LOC8077236   | 6 | RING-H2 finger protein ATL80                                         |
| LOC8077066   | 6 | glutamic acid-rich protein                                           |
| LOC8076992   | 6 | WRKY transcription factor WRKY24                                     |
| LOC8076518   | 6 | DDB1- and CUL4-associated factor homolog 1                           |
| LOC8074745   | 6 | cyclin-P1-1                                                          |
| LOC8074619   | 6 | protein ROOT PRIMORDIUM DEFECTIVE 1                                  |
| LOC8073263   | 6 | lysine histidine transporter 2                                       |
| LOC8072647   | 6 | E3 ubiquitin-protein ligase ATL41                                    |
| LOC8070152   | 6 | serine/threo9-protein kinase PBL13                                   |
| LOC8069398   | 6 | probable LRR receptor-like serine/threo9-protein kinase At3g47570    |
| LOC8068908   | 6 | MLO-like protein 15                                                  |
| LOC8068884   | 6 | two-component response regulator ORR2                                |
| LOC8068735   | 6 | putative disease resistance protein RGA3                             |
| LOC8068151   | 6 | ethylene-responsive transcription factor RAP2-7                      |
| LOC8065957   | 6 | BTB/POZ and MATH domain-containing protein 1                         |
| LOC8065088   | 6 | pentatricopeptide repeat-containing protein At3g53700, chloroplastic |
| LOC8063734   | 6 | E3 ubiquitin-protein ligase ATL6                                     |
| LOC8063318   | 6 | myb-related protein Hv1                                              |
| LOC8061011   | 6 | extradiol ring-cleavage dioxygenase                                  |
| LOC8060631   | 6 | probable serine/threo9-protein kinase At1g54610                      |
| LOC8060587   | 6 | GDP-fucose transporter 1                                             |
| LOC8060473   | 6 | pentatricopeptide repeat-containing protein At4g38150                |
| LOC8059671   | 6 | pentatricopeptide repeat-containing protein At5g04810, chloroplastic |
| LOC8058795   | 6 | L-type lectin-domain containing receptor kinase IV.2                 |
| LOC8058688   | 6 | probable amino acid permease 7                                       |
| LOC8057520   | 6 | cyclin-T1-1                                                          |
| LOC8056049   | 6 | protein ROS1                                                         |
| LOC8054971   | 6 | GRIP and coiled-coil domain-containing protein 2                     |
| LOC8054698   | 6 | conserved oligomeric Golgi complex subunit 1                         |
| LOC8054224   | 6 | BTB/POZ domain-containing protein At5g67385                          |
| LOC110434929 | 6 | polyadenylate-binding protein-interacting protein 8-like             |
| LOC110434013 | 6 | protein trichome birefringence-like 38                               |
| LOC110433405 | 6 | probable E3 ubiquitin-protein ligase RHC1A                           |
| LOC110432817 | 6 | ethylene-responsive transcription factor 1-like                      |
| LOC110431408 | 6 | formin-like protein 5                                                |
| LOC110430688 | 6 | probable E3 ubiquitin-protein ligase XBOS36                          |
| LOC8155274   | 5 | SEC1 family transport protein SLY1                                   |
| LOC8086232   | 5 | phytochrome C                                                        |
| LOC8077118   | 5 | calmodulin-binding transcription activator 3                         |
| LOC8076103   | 5 | BEACH domain-containing protein B                                    |
| LOC8071112   | 5 | nuclear transcription factor Y subunit C-4                           |
| LOC8069662   | 5 | thyroid adenoma-associated protein homolog                           |

|              |             |                                                                      |
|--------------|-------------|----------------------------------------------------------------------|
| LOC8061607   | 5           | probable alpha-glucosidase Os06g0675700                              |
| LOC8059991   | 5           | phytochrome a                                                        |
| LOC8062369   | 4.666666667 | NDR1/HIN1-like protein 10                                            |
| LOC110433366 | 4.666666667 | heavy metal-associated isoprenylated plant protein 35-like           |
| LOC8070444   | 4.571428571 | rust resistance kinase Lr10                                          |
| LOC8086401   | 4           | F-box/FBD/LRR-repeat protein At1g13570                               |
| LOC8086315   | 4           | leucine-rich repeat extensin-like protein 5                          |
| LOC8086103   | 4           | putative disease resistance protein RGA3                             |
| LOC8085720   | 4           | protein DOWNY MILDEW RESISTANCE 6                                    |
| LOC8085397   | 4           | WRKY transcription factor WRKY24                                     |
| LOC8085295   | 4           | protein OBERON 4                                                     |
| LOC8085179   | 4           | ferrochelatase-1, chloroplastic                                      |
| LOC8085027   | 4           | pentatricopeptide repeat-containing protein At2g26790, mitochondrial |

**Supplementary Table S4.** List of Sodamchal genes along with  $K_a / K_s$  ratio ratio based on the sorghum reference genome (BTx623)

| Gene Symbol  | $K_a / K_s$ ratio | Description                                                         |
|--------------|-------------------|---------------------------------------------------------------------|
| LOC8080554   | 16                | Krueppel-like factor 12                                             |
| LOC8079990   | 16                | F-box/LRR-repeat protein At3g59190                                  |
| LOC8071511   | 14                | metacaspase-2                                                       |
| LOC8063070   | 14                | malonyl-CoA:anthocyanidin 5-O-glucoside-6"-O-malonyltransferase     |
| LOC8055185   | 12                | sulfofructose kinase                                                |
| LOC8083021   | 12                | protein LURP-one-related 8                                          |
| LOC8055328   | 10                | probable E3 ubiquitin-protein ligase RHB1A                          |
| LOC8082315   | 10                | phylloplanin                                                        |
| LOC8055612   | 10                | DAR GTPase 2, mitochondrial                                         |
| LOC110429543 | 8                 | ureide permease 1-like                                              |
| LOC8069662   | 8                 | thyroid adenoma-associated protein homolog                          |
| LOC8075529   | 8                 | threonylcarbamoyladenosine tRNA methyltransferase                   |
| LOC8065266   | 8                 | serine/threo9-protein kinase prpf4B                                 |
| LOC8070203   | 8                 | scarecrow-like protein 9                                            |
| LOC8074808   | 8                 | putative nuclear RNA export factor SDE5                             |
| LOC8071980   | 8                 | protein Rf1, mitochondrial                                          |
| LOC8069648   | 8                 | MOB kinase activator-like 1A                                        |
| LOC8076739   | 8                 | ESX-1 secretion-associated protein EspK                             |
| LOC8084078   | 8                 | cysteine-rich receptor-like protein kinase 6                        |
| LOC8084080   | 8                 | cysteine-rich receptor-like protein kinase 10                       |
| LOC8074629   | 8                 | centromere-associated protein E                                     |
| LOC8078852   | 8                 | ATP-dependent Clp protease ATP-binding subunit CLPT1, chloroplastic |
| LOC8082436   | 8                 | aspartyl protease family protein At5g10770                          |
| LOC8060710   | 8                 | ADP-glucose phosphorylase                                           |
| LOC8081385   | 7                 | protein ETHYLENE-INSENSITIVE 2                                      |
| LOC8081161   | 7                 | indole-3-acetaldehyde oxidase                                       |

|              |             |                                                                          |
|--------------|-------------|--------------------------------------------------------------------------|
| LOC8085397   | 6           | WRKY transcription factor WRKY24                                         |
| LOC8082900   | 6           | ultraviolet-B receptor UVR8                                              |
| LOC8061473   | 6           | U-box domain-containing protein 4                                        |
| LOC8054934   | 6           | scopoletin glucosyltransferase                                           |
| LOC8060446   | 6           | RING-H2 finger protein ATL74                                             |
| LOC8071847   | 6           | receptor-like kinase TMK4                                                |
| LOC110429787 | 6           | putative RING-H2 finger protein ATL71                                    |
| LOC8072749   | 6           | putative receptor-like protein kinase At3g47110                          |
| LOC8074063   | 6           | putative disease resistance RPP13-like protein 3                         |
| LOC8083044   | 6           | putative disease resistance protein RGA3                                 |
| LOC8086103   | 6           | putative disease resistance protein RGA3                                 |
| LOC8065254   | 6           | protein NRT1/ PTR FAMILY 2.9                                             |
| LOC8074463   | 6           | protein NETWORKED 2B                                                     |
| LOC8086274   | 6           | protein ENHANCED DISEASE RESISTANCE 2                                    |
| LOC8060280   | 6           | protein ECERIFERUM 3                                                     |
| LOC8076620   | 6           | probable histone acetyltransferase HAC-like 3                            |
| LOC8058688   | 6           | probable amino acid permease 7                                           |
| LOC8085294   | 6           | nuclear pore complex protein NUP214                                      |
| LOC8067210   | 6           | mitochondrial import inner membrane translocase subunit TIM22-2          |
| LOC8058795   | 6           | L-type lectin-domain containing receptor kinase IV.2                     |
| LOC8063970   | 6           | lecithin-cholesterol acyltransferase-like 4                              |
| LOC110436749 | 6           | junctophilin-4-like                                                      |
| LOC110431408 | 6           | formin-like protein 5                                                    |
| LOC8079895   | 6           | F-box protein At3g26010                                                  |
| LOC8064576   | 6           | eukaryotic translation initiation factor 5B                              |
| LOC8060250   | 6           | dicer-like protein 4                                                     |
| LOC8057520   | 6           | cyclin-T1-1                                                              |
| LOC8074745   | 6           | cyclin-P1-1                                                              |
| LOC8054224   | 6           | BTB/POZ domain-containing protein At5g67385                              |
| LOC8083384   | 6           | BEACH domain-containing protein C2                                       |
| LOC8075550   | 5.333333333 | ribonuclease E/G-like protein, chloroplastic                             |
| LOC8074071   | 5           | UDP-glycosyltransferase 73D1                                             |
| LOC8083547   | 5           | tuliposide A-converting enzyme 1, chloroplastic                          |
| LOC8067888   | 5           | protein transport protein SEC16A homolog                                 |
| LOC8056351   | 5           | probable arabinosyltransferase ARAD1                                     |
| LOC8074141   | 5           | glycine-rich RNA-binding protein 4, mitochondrial                        |
| LOC8062369   | 4.666666667 | NDR1/HIN1-like protein 10                                                |
| LOC8072256   | 4.333333333 | protein CHROMATIN REMODELING 5                                           |
| LOC8059626   | 4           | zinc finger A20 and AN1 domain-containing stress-associated protein 5    |
| LOC8058420   | 4           | WRKY transcription factor WRKY28                                         |
| LOC8071087   | 4           | WEB family protein At5g16730, chloroplastic                              |
| LOC8056024   | 4           | UDP-glycosyltransferase 82A1                                             |
| LOC8082845   | 4           | UDP-glycosyltransferase 73C7                                             |
| LOC110436522 | 4           | ubiquitin recognition factor in ER-associated degradation protein 1-like |
| LOC8058405   | 4           | U3 small nucleolar RNA-associated protein 21 homolog                     |
| LOC110435576 | 4           | two-component response regulator ORR9-like                               |

|              |   |                                                               |
|--------------|---|---------------------------------------------------------------|
| LOC110432047 | 4 | tubby-like F-box protein 6                                    |
| LOC8067674   | 4 | tryptophan synthase beta chain 2                              |
| LOC8068110   | 4 | transcription termination factor MTERF15, mitochondrial       |
| LOC8061153   | 4 | thioredoxin H2-2                                              |
| LOC110432820 | 4 | suppressor of RPS4-RLD 1                                      |
| LOC8069812   | 4 | SUPPRESSOR OF ABI3-5                                          |
| LOC8082113   | 4 | sucrose transport protein SUT1                                |
| LOC8082166   | 4 | single myb histone 1                                          |
| LOC8062455   | 4 | signal recognition particle subunit SRP72                     |
| LOC8055196   | 4 | serine--glyoxylate aminotransferase                           |
| LOC8078653   | 4 | serine/threo9-protein phosphatase 6 regulatory subunit 3      |
| LOC8077396   | 4 | serine/threo9-protein kinase rio2                             |
| LOC110434650 | 4 | serine/argi9-rich splicing factor 4-like                      |
| LOC110437323 | 4 | serine/argi9 repetitive matrix protein 1-like                 |
| LOC8071741   | 4 | serine protease SPPA, chloroplastic                           |
| LOC8055540   | 4 | serine carboxypeptidase-like 17                               |
| LOC8073129   | 4 | serine carboxypeptidase II-3                                  |
| LOC8155274   | 4 | SEC1 family transport protein SLY1                            |
| LOC110433790 | 4 | SCAR-like protein 2                                           |
| LOC8059047   | 4 | sarcoplasmic reticulum histidine-rich calcium-binding protein |
| LOC8059669   | 4 | S-adenosylmethio9 decarboxylase proenzyme                     |
| LOC8083016   | 4 | root phototropism protein 2                                   |
| LOC8082208   | 4 | RGF repeats nuclear RNA binding protein A                     |
| LOC8065239   | 4 | receptor-like protein kinase HAIKU2                           |
| LOC110434108 | 4 | receptor kinase-like protein Xa21                             |
| LOC8061026   | 4 | receptor kinase-like protein Xa21                             |
| LOC8072297   | 4 | putative peptidyl-tRNA hydrolase PTRHD1                       |
| LOC8076755   | 4 | putative disease resistance protein RGA3                      |

---
